# Supplementary material
Source: PubMed Central journal article supplement (PMC4170818)
Supplement: ci500363p_si_001.pdf [file ci500363p_si_001.pdf]

# Supporting Information

## Enumeration of Ring-Chain Tautomers Based on SMIRKS Rules

*Laura Guasch, Markus Sitzmann and Marc C. Nicklaus\**

Chemical Biology Laboratory, Center for Cancer Research, National Cancer Institute, National Institutes of Health, Frederick National Laboratory for Cancer Research, Frederick, MD 21702, USA

\*E-mail: [mn1@helix.nih.gov](mailto:mn1@helix.nih.gov)

### CONTENTS

**Table SI1** - Complete list of ring-chain transformations.

**Table SI2** - Bibliographic examples of ring-chain tautomerism together with predicted tautomers.

| Breaking Bond | Geometry Carbon | Size of ring                                                                                                                                                           | Rule                                                                                                                                                                                   | SMIRKS                                                                                                                                                                            |
|---------------|-----------------|------------------------------------------------------------------------------------------------------------------------------------------------------------------------|----------------------------------------------------------------------------------------------------------------------------------------------------------------------------------------|-----------------------------------------------------------------------------------------------------------------------------------------------------------------------------------|
| exo           | trig            | 3                                                                                                                                                                      | RC1                                                                                                                                                                                    | [#1:1][O,N,S,Se,Te:2][#6R1;!c;z2:3]1[#6;!c;R1:4][O,N,S,Se,Te;R1:5]1>>[O,N,S,Se,Te:2]=[C;!R;z1:3][#6;!R:4][O,N,S,Se,Te;!R:5][#1:1]                                                 |
|               |                 | 4                                                                                                                                                                      | RC2                                                                                                                                                                                    | [#1:1][O,N,S,Se,Te:2][#6R1;!c:3]1[#6;R1:4]-[C;R1:6][O,N,S,Se,Te;R1:5]1>>[O,N,S,Se,Te:2]=[C;!R:3][C;!R:4][C;!R:6][O,N,S,Se,Te;!R:5][#1:1]                                          |
|               |                 | 5                                                                                                                                                                      | RC3                                                                                                                                                                                    | [#1:1][O,N,S,Se,Te:2][#6R1;!c:3]1[*:4]-[*:7]-[R1:6][O,N,S,Se,Te;R1:5]1>>[O,N,S,Se,Te:2]=[C;!R:3][R{0-1}:4]-[R{0-1}:7][!R:6][O,N,S,Se,Te:5][#1:1]                                  |
|               |                 |                                                                                                                                                                        | RC3'                                                                                                                                                                                   | [#1:1][O,N,S,Se,Te:2][#6R1;!c:3]1[*:R1:4]-[*:7]-[R:6][O,N,S,Se,Te;R1:5]1>>[O,N,S,Se,Te:2]=[C;!R:3][!R:4]-[R{0-1}:7][R{0-1}:6][O,N,S,Se,Te;!R:5][#1:1]                             |
|               |                 | RC3"                                                                                                                                                                   | [#1:1][O,N,S,Se,Te:2][#6R1;!c:3]1[*:R1:4]-[*:7]-[R:6][N:5]1>>[O,N,S,Se,Te:2]=[C;!R:3][!R:4]-[!R:7][R{0-1}:6][N:5][#1:1]                                                                |                                                                                                                                                                                   |
|               |                 | 6                                                                                                                                                                      | RC4                                                                                                                                                                                    | [#1:1][O,N,S,Se,Te:2][#6R1;!c:3]1[*:4]-[*:7]-[*:R1:8]-[C;R1:6][O,N,S,Se,Te;R1:5]1>>[O,N,S,Se,Te:2]=[C;!R:3][R{0-1}:4]-[R{0-1}:7]-[!R:8]-[!C:6][O,N,S,Se,Te:5][#1:1]               |
|               |                 |                                                                                                                                                                        | RC4'                                                                                                                                                                                   | [#1:1][O,N,S,Se,Te:2][#6R1;!c:3]1[*:R1:4]-[*:7]-[*:8]-[R1:6][O,N,S,Se,Te;R1:5]1>>[O,N,S,Se,Te:2]=[C;!R:3][!R:4]-[R{0-1}:7]-[R{0-1}:8]-[!R:6][O,N,S,Se,Te:5][#1:1]                 |
|               |                 |                                                                                                                                                                        | RC4"                                                                                                                                                                                   | [#1:1][O,N,S,Se,Te:2][#6R1;!c:3]1[*:R1:4]-[*:R1:7]-[*:8]-[R:6][O,N,S,Se,Te;R1:5]1>>[O,N,S,Se,Te:2]=[C;!R:3][!R:4]-[!R:7]-[R{0-1}:8]-[R{0-1}:6][O,N,S,Se,Te;!R:5][#1:1]            |
|               |                 |                                                                                                                                                                        | RC4""                                                                                                                                                                                  | [#1:1][O,N,S,Se,Te:2][#6R1;!c:3]1[*:R1:4]-[*:R1:7]-[*:R1:8]-[R:6][N:5]1>>[O,N,S,Se,Te:2]=[C;!R:3][!R:4]-[!R:7]-[!R:8]-[R{0-1}:6][N:5][#1:1]                                       |
|               |                 | 7                                                                                                                                                                      | RC5                                                                                                                                                                                    | [#1:1][O,N,S,Se,Te:2][#6R1;!c:3]1[*:4]-[*:7]-[*:R1:8]-[*:R1:9]-[R1:6][O,N,S,Se,Te;R1:5]1>>[O,N,S,Se,Te:2]=[C;!R:3][R{0-1}:4]-[R{0-1}:7]-[!R:8]-[!R:9]-[!R:6][O,N,S,Se,Te:5][#1:1] |
|               | RC5'            |                                                                                                                                                                        | [#1:1][O,N,S,Se,Te:2][#6R1;!c:3]1[*:R1:4]-[*:7]-[*:8]-[*:R1:9]-[R1:6][O,N,S,Se,Te;R1:5]1>>[O,N,S,Se,Te:2]=[C;!R:3][!R:4]-[R{0-1}:7]-[R{0-1}:8]-[!R:9]-[!R:6][O,N,S,Se,Te:5][#1:1]      |                                                                                                                                                                                   |
|               | RC5"            |                                                                                                                                                                        | [#1:1][O,N,S,Se,Te:2][#6R1;!c:3]1[*:R1:4]-[*:R1:7]-[*:8]-[*:9]-[R1:6][O,N,S,Se,Te;R1:5]1>>[O,N,S,Se,Te:2]=[C;!R:3][!R:4]-[!R:7]-[R{0-1}:8]-[R{0-1}:9]-[!R:6][O,N,S,Se,Te:5][#1:1]      |                                                                                                                                                                                   |
|               | RC5""           |                                                                                                                                                                        | [#1:1][O,N,S,Se,Te:2][#6R1;!c:3]1[*:R1:4]-[*:R1:7]-[*:R1:8]-[*:9]-[R:6][O,N,S,Se,Te;R1:5]1>>[O,N,S,Se,Te:2]=[C;!R:3][!R:4]-[!R:7]-[!R:8]-[R{0-1}:9]-[R{0-1}:6][O,N,S,Se,Te;!R:5][#1:1] |                                                                                                                                                                                   |
|               | dig             | 5                                                                                                                                                                      | RC6                                                                                                                                                                                    | [#1:1][N:2]=[#6R1;!c:3]1[*:4]-[*:7]-[#6R1:6][O,N,S,Se,Te;R1:5]1>>[N;X1:2]#[C;!R:3][R{0-1}:4]-[R{0-1}:7]-[#6;!R:6][O,N,S,Se,Te:5][#1:1]                                            |
|               |                 |                                                                                                                                                                        | RC6'                                                                                                                                                                                   | [#1:1][N:2]=[#6R1;!c:3]1[*:R1:4]-[*:7]-[#6R:6][O,N,S,Se,Te;R1:5]1>>[N;X1:2]#[C;!R:3][!R:4]-[R{0-1}:7]-[#6;R{0-1}:6][O,N,S,Se,Te;!R:5][#1:1]                                       |
|               |                 |                                                                                                                                                                        | RC6"                                                                                                                                                                                   | [#1:1][N:2]=[#6R1;!c:3]1[*:R1:4]-[*:R1:7]-[#6R:6][N:5]1>>[N;X1:2]#[C;!R:3][!R:4]-[!R:7]-[#6;R{0-1}:6][N:5][#1:1]                                                                  |
|               |                 | 6                                                                                                                                                                      | RC7                                                                                                                                                                                    | [#1:1][N:2]=[#6R1;!c:3]1[*:4]-[*:7]-[*:R1:8]-[#6R1:6][O,N,S,Se,Te;R1:5]1>>[N;X1:2]#[C;!R:3][R{0-1}:4]-[R{0-1}:7]-[*;!R:8]-[#6;!R:6][O,N,S,Se,Te:5][#1:1]                          |
|               |                 |                                                                                                                                                                        | RC7'                                                                                                                                                                                   | [#1:1][N:2]=[#6R1;!c:3]1[*:R1:4]-[*:7]-[*:8]-[#6R1:6][O,N,S,Se,Te;R1:5]1>>[N;X1:2]#[C;!R:3][!R:4]-[R{0-1}:7]-[*;R{0-1}:8]-[#6;!R:6][O,N,S,Se,Te:5][#1:1]                          |
|               |                 |                                                                                                                                                                        | RC7"                                                                                                                                                                                   | [#1:1][N:2]=[#6R1;!c:3]1[*:R1:4]-[*:R1:7]-[*:8]-[#6R:6][O,N,S,Se,Te;R1:5]1>>[N;X1:2]#[C;!R:3][!R:4]-[!R:7]-[*;R{0-1}:8]-[#6;R{0-1}:6][O,N,S,Se,Te;!R:5][#1:1]                     |
|               |                 | RC7""                                                                                                                                                                  | [#1:1][N:2]=[#6R1;!c:3]1[*:R1:4]-[*:R1:7]-[*:R1:8]-[#6R:6][N:5]1>>[N;X1:2]#[C;!R:3][!R:4]-[!R:7]-[!R:8]-[#6;R{0-1}:6][N:5][#1:1]                                                       |                                                                                                                                                                                   |
| 7             |                 | RC8                                                                                                                                                                    | [#1:1][N:2]=[#6R1;!c:3]1[*:4]-[*:7]-[*:R1:8]-[*:R1:9]-[#6R1:6][O,N,S,Se,Te;R1:5]1>>[N;X1:2]#[C;!R:3][R{0-1}:4][R{0-1}:7][*;!R:8][*;!R:9][#6;!R:6][O,N,S,Se,Te:5][#1:1]                 |                                                                                                                                                                                   |
|               | RC8'            | [#1:1][N:2]=[#6R1;!c:3]1[*:R1:4]-[*:7]-[*:8]-[*:R1:9]-[#6R1:6][O,N,S,Se,Te;R1:5]1>>[N;X1:2]#[C;!R:3][!R:4][R{0-1}:7][*;R{0-1}:8][*;!R:9][#6;!R:6][O,N,S,Se,Te:5][#1:1] |                                                                                                                                                                                        |                                                                                                                                                                                   |

|      |          |   |                                                                                                                                                                             |                                                                                                                                                                            |
|------|----------|---|-----------------------------------------------------------------------------------------------------------------------------------------------------------------------------|----------------------------------------------------------------------------------------------------------------------------------------------------------------------------|
|      |          |   | RC8"                                                                                                                                                                        | [#1:1][N:2]=[#6R1;!c:3]1[*;R1:4]-[*;R1:7]-[*;8]-[*;9]-[#6R1:6][O,N,S,Se,Te;R:5]1>>[N;X1:2]#[C;!R:3][!R:4][!R:7][*;R{0-1}:8][*;R{0-1}:9][#6;!R:6][O,N,S,Se,Te:5][#1:1]      |
|      |          |   | RC8'''                                                                                                                                                                      | [#1:1][N:2]=[#6R1;!c:3]1[*;R1:4]-[*;R1:7]-[*;R1:8]-[*;9]-[#6R:6][O,N,S,Se,Te;R:5]1>>[N;X1:2]#[C;!R:3][!R:4][!R:7][*;!R:8][*;R{0-1}:9][#6;R{0-1}:6][O,N,S,Se,Te;!R:5][#1:1] |
|      |          |   | RC8''''                                                                                                                                                                     | [#1:1][N:2]=[#6R1;!c:3]1[*;R1:4]-[*;R1:7]-[*;R1:8]-[*;R1:9]-[#6R:6][N:5]1>>[N;X1:2]#[C;!R:3][!R:4][!R:7][*;!R:8][*;!R:9][#6;R{0-1}:6][N:5][#1:1]                           |
| endo | trig     | 5 | RC9                                                                                                                                                                         | [#1:1][N;R1;X3:3]1[!a:4]-[R:6][O,N,S,Se,Te;R:5][#6R;z2;X4:2]1>>[C;!R;z1;X3:2]=[N;!R,X2;+0:3][*;4]-[*;6][O,N,S,Se,Te;!R:5][#1:1]                                            |
|      |          |   | RC9'                                                                                                                                                                        | [#1:1][N;R1;X3:3]1[!a:R1:4]-[R:6][N:5][#6R;z2;X4:2]1>>[C;!R;z1;X3:2]=[N;!R,X2;+0:3][!R:4]-[*;6][N:5][#1:1]                                                                 |
|      |          |   | RC9''                                                                                                                                                                       | [#1:1][O:7][N;R1:3]1[!a:4]-[R:6][O,N,S,Se,Te;R:5][#6R;z2;X4:2]1>>[C;!R;z1;X3:2]=[N+;!R:3]([O:7])[*;4]-[*;6][O,N,S,Se,Te;!R:5][#1:1]                                        |
|      |          | 6 | RC10                                                                                                                                                                        | [#1:1][N;R1;X3:3]1[!a:4]-[*;7]-[*;R1:6][O,N,S,Se,Te;R:5][#6R;z2;X4:2]1>>[C;!R;z1;X3:2]=[N;!R;+0:3][R{0-1}:4]-[*;R{0-1}:7]-[!R:6][O,N,S,Se,Te:5][#1:1]                      |
|      |          |   | RC10'                                                                                                                                                                       | [#1:1][N;R1;X3:3]1[!a:R1:4]-[*;7]-[*;6][O,N,S,Se,Te;R:5][#6R;z2;X4:2]1>>[C;!R;z1;X3:2]=[N;!R;+0:3][!R:4]-[*;R{0-1}:7]-[R{0-1}:6][O,N,S,Se,Te;!R:5][#1:1]                   |
|      |          |   | RC10''                                                                                                                                                                      | [#1:1][N;R1;X3:3]1[!a:R1:4]-[*;R1:7]-[*;6][N:5][#6R;z2;X4:2]1>>[C;!R;z1;X3:2]=[N;!R;+0:3][!R:4]-[*;!R:7]-[R{0-1}:6][N:5][#1:1]                                             |
|      |          |   | RC10'''                                                                                                                                                                     | [#1:1][O:8][N;R1;X3:3]1[!a:4]-[*;7]-[*;R1:6][O,N,S,Se,Te;R:5][#6R;z2;X4:2]1>>[C;!R;z1;X3:2]=[N+;!R:3]([O:8])[R{0-1}:4]-[*;R{0-1}:7]-[!R:6][O,N,S,Se,Te:5][#1:1]            |
|      |          | 7 | RC11                                                                                                                                                                        | [#1:1][N;R1;X3:3]1[!a:4]-[*;7]-[*;R1:8]-[R1:6][O,N,S,Se,Te;R:5][#6R;z2;X4:2]1>>[C;!R;z1;X3:2]=[N;!R;+0:3][R{0-1}:4]-[*;R{0-1}:7]-[*;!R:8]-[!R:6][O,N,S,Se,Te:5][#1:1]      |
|      |          |   | RC11'                                                                                                                                                                       | [#1:1][N;R1;X3:3]1[!a:R1:4]-[*;7]-[*;8]-[R1:6][O,N,S,Se,Te;R:5][#6R;z2;X4:2]1>>[C;!R;z1;X3:2]=[N;!R;+0:3][!R:4]-[*;R{0-1}:7]-[*;R{0-1}:8]-[!R:6][O,N,S,Se,Te:5][#1:1]      |
|      | RC11''   |   | [#1:1][N;R1;X3:3]1[!a:R1:4]-[*;R1:7]-[*;8]-[R:6][O,N,S,Se,Te;R:5][#6R;z2;X4:2]1>>[C;!R;z1;X3:2]=[N;!R;+0:3][!R:4]-[*;!R:7]-[*;R{0-1}:8]-[R{0-1}:6][O,N,S,Se,Te;!R:5][#1:1]  |                                                                                                                                                                            |
|      | RC11'''  |   | [#1:1][N;R1;X3:3]1[!a:R1:4]-[*;R1:7]-[*;R1:8]-[R:6][N:5][#6R;z2;X4:2]1>>[C;!R;z1;X3:2]=[N;!R;+0:3][!R:4]-[*;!R:7]-[*;!R:8]-[R{0-1}:6][N:5][#1:1]                            |                                                                                                                                                                            |
|      | RC11'''' |   | [#1:1][O:9][N;R1;X3:3]1[!a:4]-[*;7]-[*;8]-[*;R1:6][O,N,S,Se,Te;R:5][#6R;z2;X4:2]1>>[C;!R;z1;X3:2]=[N+;!R:3]([O:9])[R{0-1}:4]-[*;R{0-1}:7]-[*;8]-[!R:6][O,N,S,Se,Te:5][#1:1] |                                                                                                                                                                            |

**Table SI2** - Bibliographic examples of ring-chain tautomerism together with predicted tautomers.

| Ref | SMILES (input molecule / tautomer(s))                                                                                                                                                                                                     | Ring-chain rule applied | #experimentally identified ring-chain tautomers | #predicted ring-chain tautomers | #predicted prototropic tautomers | #predicted tautomers for both types |
|-----|-------------------------------------------------------------------------------------------------------------------------------------------------------------------------------------------------------------------------------------------|-------------------------|-------------------------------------------------|---------------------------------|----------------------------------|-------------------------------------|
| 1   | <b>C1=CC(=CC=C1)C=NC(CC(=O)N)C(=O)O</b><br>C1=CC(=CC=C1)C2NC(CC(N2)=O)C(O)=O                                                                                                                                                              | 6_endo_trig             | 1                                               | 18                              | 2                                | 149                                 |
| 2   | <b>C1(=C(C2=C(C(=C1)O)C(C(C(C2=O)C3CCCC(C3)=O)O)=O)O)CI</b><br>C1(=C(C2=C(C(=C1)O)C(C4C(C2=O)C3CCCC(C3)(O)O4)=O)O)CI                                                                                                                      | Not covered             | 1                                               | 0                               | 86                               | 0                                   |
| 3   | <b>C1=CC=CC(=C1C)N2[C@H](C(OC2=O)(C)C)O</b><br>C1=CC=CC(=C1C)NC(OC(C=O)(C)C)=O                                                                                                                                                            | 5_exo_trig              | 1                                               | 1                               | 0                                | 3                                   |
| 4   | <b>C1[N+](CC[CH2]C1)=[C](C)CCC(=[N+][O-])[O-]C</b>                                                                                                                                                                                        | Not applicable          |                                                 |                                 |                                  |                                     |
| 5   | <b>c1cccc(c12)Sec3c(cccc3)C=NCCNCCN=Cc4c(cccc4)Sec5c(cccc5)C=NCCNCCN=C2</b><br>c1cccc(c1[CH]23)Sec4c(cccc4)C=NCCNCCN=Cc5c(cccc5)Sec6c(cccc6)C=NCCN2CCN3<br>c1cccc(c1[CH]23)Sec4c(cccc4)C=NCCN5[CH](NCC5)c6c(cccc6)Sec7c(cccc7)C=NCCN2CCN3 | Not covered             | 2                                               | 0                               | 0                                | 0                                   |
| 6   | <b>C1(NC(OC1)C2=CC=C(C=C2)CI)C3=CC=CC=C3</b><br>C(N=CC1=CC=C(C=C1)CI)(CO)C2=CC=CC=C2                                                                                                                                                      | 5_endo_trig             | 1                                               | 1                               | 0                                | 1                                   |
| 7   | <b>N1=C(C=CC=C1)C(C2=C(CC(CC2=O)(C)C)O)C3=C(CC(CC3=O)(C)C)O</b><br>N1=C(C=CC=C1)C3C2=C(CC(CC2(O)OC4=C3C(CC(C4)(C)C)=O)(C)C)O                                                                                                              | Not covered             | 1                                               | 0                               | 74                               | 74                                  |
| 8   | <b>C13(N(C(OC1)C2=CC=CC=C2)C(SC3)C4=CC=CC=C4)CO</b>                                                                                                                                                                                       | Not applicable          |                                                 |                                 |                                  |                                     |
| 9   | <b>C1CCC(C(=C1)N2CCCC2)C(C[N](=O)=O)C(CI)(CI)CI</b>                                                                                                                                                                                       | Not applicable          |                                                 |                                 |                                  |                                     |
| 10  | <b>C1(=CC(=CC=C1)C2OCCCN2)C3NCCCO3</b><br>C1(=CC(=CC=C1)C=NCCCO)C2NCCCO2<br>C1(=CC(=CC=C1)C=NCCCO)C=NCCCO                                                                                                                                 | 6_endo_trig             | 2                                               | 2                               | 0                                | 2                                   |
| 11  | <b>C3=C(C(C1=C(OC2=C(C1=O)C=CC=C2)O)CC(=O)C)C=CC=C3</b><br>C4=C(C3C1=C(OC2=C(C1=O)C=CC=C2)OC(C3)(O)C)C=CC=C4                                                                                                                              | 6_exo_trig              | 1                                               | 1                               | 8                                | 10                                  |
| 12  | <b>C1=CC2=C(C=C1)C(NNC(S2)C3=CC=C(C=C3)[N](=O)=O)=O</b><br>C1=CC(=C(C=C1)C(NN=CC2=CC=C(C=C2)[N](=O)=O)=O)S                                                                                                                                | 7_endo_trig             | 1                                               | 1                               | 1                                | 14                                  |
| 13  | <b>C1=CC=CC(=C1)NC(OC(C=O)(C)C)=O</b><br>C1=CC=CC(=C1)N2C(OC(C2O)(C)C)=O                                                                                                                                                                  | 5_exo_trig              | 1                                               | 1                               | 1                                | 3                                   |
| 14  | <b>C1(=C(SC=C1)C(C2=C(C=CS2)C)=CCCO)C</b>                                                                                                                                                                                                 | Not applicable          |                                                 |                                 |                                  |                                     |
| 15  | <b>C1=CC=CC(=C1)C2C(NC(O2)C3=C(C=C3)C)C</b><br>C1=CC=CC(=C1)C(C(N=CC2=C(C=C2)C)C)O                                                                                                                                                        | 5_endo_trig             | 1                                               | 1                               | 0                                | 1                                   |
| 16  | <b>N1(C(N(C1)C2=CC=CC=C2)O)C3=CC=CC=C3)C</b><br>N(CC([N+](=CC1=CC=CC=C1)[O-])C2=CC=CC=C2)C                                                                                                                                                | 5_endo_trig             | 1                                               | 1                               | 0                                | 1                                   |
| 17  | <b>C1=CC(=C(C=C1)C([P](O)(=O)OC)=O)C(O)=O</b><br>C1=CC2=C(C=C1)C([P](O)(=O)OC)(O)OC2=O                                                                                                                                                    | 5_exo_trig              | 1                                               | 2                               | 0                                | 2                                   |
| 18  | <b>C1=CC=CC=C1C2OCC(N2)C</b><br>C1=CC=CC=C1C=NC(CO)C                                                                                                                                                                                      | 5_endo_trig             | 1                                               | 1                               | 0                                | 1                                   |
| 19  | <b>C1=C(C=C(C=C1)C2OCCC(N2)C)C</b><br>C1=C(C=C(C=C1)C=NC(CCO)C)C                                                                                                                                                                          | 6_endo_trig             | 1                                               | 1                               | 0                                | 1                                   |
| 20  | <b>C1=CC2=C(C=C1)C(NNC(S2)(C)C)=O</b><br>C1=CC(=C(C=C1)C(NN=C(C)C)=O)S                                                                                                                                                                    | 7_endo_trig             | 1                                               | 1                               | 1                                | 41                                  |
| 21  | <b>C1N(C(N(C1C2=CC=CC=C2)O)C3=CC=C(C=C3)CI)C4=CC=C(C=C4)C</b><br>C(NC1=CC=C(C=C1)C)C([N+](=CC2=CC=C(C=C2)CI)[O-])C3=CC=CC=C3                                                                                                              | 5_endo_trig             | 1                                               | 1                               | 0                                | 1                                   |
| 22  | <b>C1=CC2C(=CN1C)C(NC2(C3=CC=CC=C3)O)=O</b><br>C1=CC(C(=CN1C)C(N)=O)C(C2=CC=CC=C2)=O                                                                                                                                                      | 5_exo_trig              | 1                                               | 1                               | 1                                | 7                                   |
| 23  | <b>C1(NC(OCC1)C2=CC=CC=C2)C</b>                                                                                                                                                                                                           | 6_endo_trig             | 1                                               | 1                               | 0                                | 1                                   |



|    |                                                                                                                                                      |                           |   |   |   |    |
|----|------------------------------------------------------------------------------------------------------------------------------------------------------|---------------------------|---|---|---|----|
|    | <b>C12(NC(C(C)(O)OC1)OC2)CO</b>                                                                                                                      |                           |   |   |   |    |
|    | <b>C1C(N(COC1C2=CC=CC=C2)O)C</b><br>C(C([N+](=C)[O-])C)C(O)C1=CC=CC=C1                                                                               | 6_endo_trig               | 1 | 1 | 0 | 1  |
|    | <b>S1C(NCC1)C(C(C(C(CO)O)O)O)O</b><br>SCCN=CC(C(C(C(CO)O)O)O)O<br>SCCNC1C(C(C(C(CO)O1)O)O)O                                                          | 5_endo_trig<br>6_exo_trig | 2 | 6 | 0 | 6  |
|    | <b>C1=C(C=CC=C1)NCCN=CC2=CC=CC=C2</b><br>C1=C(C=CC=C1)N2CCNC2C3=CC=CC=C3                                                                             | 5_endo_trig               | 1 | 1 | 0 | 1  |
|    | <b>C1=CC2=C(C=C1)CC3N(C2)C(NC3)C4=CC=CC=C4</b><br>C1=CC2=C(C=C1)CC(NC2)CN=CC3=CC=CC=C3                                                               | 5_endo_trig               | 1 | 1 | 0 | 1  |
|    | <b>N1C(NCCC1)C(C(C(C(CO)O)O)O)O</b><br>N(=CC(C(C(C(CO)O)O)O)O)CCCN<br>N(C1C(C(C(C(CO)O1)O)O)O)CCCN                                                   | 6_endo_trig<br>6_exo_trig | 2 | 6 | 0 | 6  |
|    | <b>C1=CC2=C(C=C1)CNC(N2)(CC(N(O)C3=CC=CC=C3)=O)C</b><br>C1=CC(=C(C=C1)CN=C(CC(N(O)C2=CC=CC=C2)=O)C)N<br>C1=CC(=C(C=C1)CNC2(CC(N(O)C3=CC=CC=C3)=O)C)N | 6_endo_trig<br>5_exo_trig | 2 | 2 | 1 | 9  |
|    | <b>C1(NNC(SC1)(C)C)=O</b><br>C(NN=C(C)C)(CS)=O                                                                                                       | 6_endo_trig               | 1 | 1 | 2 | 6  |
|    | <b>C1=CC2=C(C=C1)C(N(NC(N2)C)C)=O</b><br>C1=CC(=C(C=C1)C(N(N=CC)C)=O)N                                                                               | 7_endo_trig               | 1 | 1 | 3 | 12 |
| 36 | <b>C(C(C)=O)CCN</b><br>C1C(C)(O)NCC1                                                                                                                 | 5_exo_trig                | 1 | 1 | 2 | 3  |
| 37 | <b>Erythromycin A</b>                                                                                                                                | Not covered               | 2 | 0 | 5 | 5  |
| 38 | <b>C1OC(CC1)(O)C(OC(C)(C)C)=O</b><br>C(O)CCC(=O)C(OC(C)(C)C)=O                                                                                       | 5_exo_trig                | 1 | 2 | 0 | 4  |
| 39 | <b>C1COC(NC1C2=CC=CC=C2)C3=CC=CC=C3</b><br>C(CO)C(N=CC1=CC=CC=C1)C2=CC=CC=C2                                                                         | 6_endo_trig               | 1 | 1 | 0 | 1  |
| 40 | <b>C1=CC2=C(C=C1)CNC(N2)C3=CC=C(C=C3)C1</b><br>C1=CC(=C(C=C1)CN=CC2=CC=C(C=C2)C1)N                                                                   | 6_endo_trig               | 1 | 1 | 0 | 1  |
| 41 | <b>C1=CC2=C(C=C1)C(N3N(C2=O)C(CC3)O)=O</b><br>C1=CC2=C(C=C1)C(N(NC2=O)CCC=O)=O                                                                       | 5_exo_trig                | 1 | 1 | 0 | 4  |
| 42 | <b>C1CC2C(CC1)COC(N2)C3=CC=CC=C3</b><br>C1CC(C(CC1)CO)N=CC2=CC=CC=C2                                                                                 | 6_endo_trig               | 1 | 1 | 0 | 1  |
|    | <b>C1(C(CCCC1)CNC(C)(C)C)N=CC2=CC=CC=C2</b><br>C12C(CCCC1)CN(C(C)(C)C)C(N2)C3=CC=CC=C3                                                               | 6_endo_trig               | 1 | 1 | 0 | 1  |
| 43 | <b>C1=CC(N2N(C1=O)C(CC2)NNC=O)=O</b><br>C1=CC(N(NC1=O)CCC=NNC=O)=O                                                                                   | 5_exo_trig                | 1 | 1 | 1 | 11 |
| 44 | <b>C(C(CC(CC(C(C)(C)C)=O)(C)ON)=O)(C)(C)C</b><br>C(C1(CC(CC(C(C)(C)C)=O)(C)ON1)O)(C)(C)C                                                             | 5_exo_trig                | 1 | 1 | 2 | 5  |
| 45 | <b>C1=CC(=CC=C1O)C4(C2=CC=C(C=C2)O)C3=CC=CC=C3C(O4)=O</b>                                                                                            | Not applicable            |   |   |   |    |
| 46 | <b>C1=C(C=CC(=C1)C=NC(CO)(C)CO)C=NC(CO)(C)CO</b><br>C1=C(C=CC(=C1)C2NC(CO2)(C)CO)C=NC(CO)(C)CO<br>C1=C(C=CC(=C1)C2NC(CO2)(C)CO)C3NC(CO3)(C)CO        | 5_endo_trig               | 2 | 2 | 0 | 2  |
| 47 | <b>C1NC(N(CC1)C)C2=CC=C(C=C2)Br</b><br>C(N=CC1=CC=C(C=C1)Br)CCNC                                                                                     | 6_endo_trig               | 1 | 1 | 0 | 1  |
| 48 | <b>C12(SCC(CO1)(C)C)C(C(C(C2)C3=CC=CC=C3)C)C</b>                                                                                                     | Not applicable            |   |   |   |    |
| 49 | <b>C1(NC(OC1C2=CC=CC=C2)C3=CC=CC=C3)C</b><br>C(N=CC1=CC=CC=C1)(C(O)C2=CC=CC=C2)C                                                                     | 5_endo_trig               | 1 | 1 | 0 | 1  |
| 50 | <b>C3(=NC1(C2(CCC(C1(C)C)C2)C)SC(=N3)C)C</b><br>C(N=C1C2(CCC(C1(C)C)C2)C)(=NC(=S)C)C                                                                 | 6_endo_trig               | 1 | 0 | 4 | 9  |

|    |                                                                  |            |   |   |   |   |
|----|------------------------------------------------------------------|------------|---|---|---|---|
| 51 | <b>C(C(O)=O)=CC(=O)C1=CC=CC=C1</b><br>C2=CC(O)(C1=CC=CC=C1)OC2=O | 5_exo_trig | 1 | 1 | 0 | 1 |
| 52 | <b>C(=O)\C=C/C(=O)O</b><br>C1(O)\C=C/C(=O)O1                     | 5_exo_trig | 1 | 1 | 0 | 1 |

This table shows the SMILES for 71 molecules extracted from the literature with the corresponding number of experimentally identified ring-chain tautomers, predicted ring-chain tautomers (by our ring-chain rules), predicted prototropic tautomers (by CACTVS tautomerism rules) and predicted tautomers of either type (by combined application of ring-chain and CACTVS tautomerism rules). The column “Ring-chain rule applied” shows the ring-chain rule that transforms the input molecule to the documented ring-chain tautomer. The SMILES in bold denote the input molecules. The plain SMILES (below the bold ones) are the corresponding documented ring-chain tautomers; they are in red if the ring-chain rules do not cover that particular transformation.

- (1) Ershov, A. Y.; Nasledov, D. G.; Nasonova, K. V.; Sezyavina, K. V.; Susarova, T. V.; Lagoda, I. V.; Shamanin, V. V. Ring-Chain Tautomerism of 2-Aryl-6-Oxohexahydropyrimidine-4-Carboxylic Acid Sodium Salts. *Chem. Heterocycl. Compd.* **2013**, *49*, 598–603.
- (2) Balaneva, N. N.; Radchenko, O. S.; Glazunov, V. P.; Novikov, V. L. 1,4-Conjugate Addition of 2-Hydroxynaphthazarins to Acyclic and Cyclic Alpha,beta-Unsaturated Ketones. Prototropic Ring-Chain Tautomerism of the Adducts. *Russ. Chem. Bull.* **2012**, *61*, 1900–1908.
- (3) Yildirim, A.; Konuklar, F. A. S.; Catak, S.; Van Speybroeck, V.; Waroquier, M.; Dogan, I.; Aviyente, V. Solvent-Catalyzed Ring-Chain-Ring Tautomerization in Axially Chiral Compounds. *Chem.-Eur. J.* **2012**, *18*, 12725–12732.
- (4) Korotaev, V. Y.; Barkov, A. Y.; Sosnovskikh, V. Y. Reactions of (E)-3,3,3-Trichloro(trifluoro)-1-Nitropropenes with Enamines Derived from Cycloalkanones. A New Type of Ring-Chain Tautomerism in a Series of Cyclobutane Derivatives and Stereochemistry of the Products. *Russ. Chem. Bull.* **2012**, *61*, 1736–1749.
- (5) Bucsa, M.; Pollnitz, A.; Varga, R. A.; Pirnau, A.; Silvestru, A.; Vlassa, M. The Ring-Chain Tautomeric Equilibria of Selenium Macrocyclic Compounds: The Isolation of the Ring Tautomer. *Dalton Trans.* **2012**, *41*, 4506–4510.
- (6) Juhasz, M.; Lazar, L.; Fueleop, F. Substituent Effects in Ring-Chain Tautomerism of the Condensation Products of Non-Racemic 1,2-Aminoalcohols with Aromatic Aldehydes. *Tetrahedron-Asymmetry* **2011**, *22*, 2012–2017.
- (7) Sigalov, M.; Shainyan, B.; Krief, P.; Ushakov, I.; Chipanina, N.; Oznobikhina, L. Intramolecular Interactions in Dimedone and Phenalen-1,3-Dione Adducts of 2(4)-Pyridinecarboxaldehyde: Enol–enol and Ring-Chain Tautomerism, Strong Hydrogen Bonding, Zwitterions. *J. Mol. Struct.* **2011**, *1006*, 234–246.

- (8) Saiz, C.; Wipf, P.; Mahler, G. Synthesis and Ring-Chain-Ring Tautomerism of Bisoxazolidines, Thiazolidinyloxazolidines, and Spirothiazolidines. *J. Org. Chem.* **2011**, *76*, 5738–5746.
- (9) Korotaev, V. Y.; Barkov, A. Y.; Slepukhin, P. A.; Kodess, M. I.; Sosnovskikh, V. Y. Unusual Ring-Chain Tautomerism in bicyclo[4.2.0]octane Derivatives. *Tetrahedron Lett.* **2011**, *52*, 3029–3032.
- (10) Nan, A.; David, L.; Tintas, M.; Lar, C.; Grosu, I. Synthesis, Stereochemistry and Ring-Chain Tautomerism of Some New Bis(1,3-Perhydrooxazin-2-Yl)benzene Derivatives. *Lett. Org. Chem.* **2011**, *8*, 16–21.
- (11) Porter, W. R. Warfarin: History, Tautomerism and Activity. *J. Comput. Aided Mol. Des.* **2010**, *24*, 553–573.
- (12) Chernitsa, B. V.; Ershov, A. Y.; Doroshenko, V. A.; Yakimovich, S. I.; Lagoda, I. V.; Zerova, I. V.; Pakal'nis, V. V.; Shamanin, V. V. Ring-Chain Tautomerism of 2-Mercaptobenzoylhydrazones of Aromatic Aldehydes. *Chem. Heterocycl. Compd.* **2010**, *46*, 1133–1137.
- (13) Demir-Ordu, O.; Dogan, I. Axially Chiral N-(o-Aryl)-4-Hydroxy-2-Oxazolidinone Derivatives from Diastereoselective Reduction of N-(o-Aryl)-2,4-Oxazolidinediones: Thermally Interconvertible Atropisomers via Ring-Chain-Ring Tautomerization. *Chirality* **2010**, *22*, 641–654.
- (14) Herbert, J. M.; Mathers, T. W. Ring-Chain Tautomerism in 2,2-bis(2-Thienyl)tetrahydrofurans: Preparation of [butene-H-2(5)]-Tiagabine. *J. Label. Compd. Radiopharm.* **2010**, *53*, 598–600.
- (15) Talancon, D.; Bosque, R.; Lopez, C. Study of the Effect Induced by the Substituents on the Ring-Chain Tautomerism of Schiff Bases Derived from Norephedrine. *J. Org. Chem.* **2010**, *75*, 3294–3300.
- (16) Coskun, N.; Aksoy, C. An Imidazolidin-1-Ol, Nitron and Oxadiazinane Ring-Chain-Ring Tautomeric Dynamic Combinatorial Library. *Tetrahedron Lett.* **2009**, *50*, 3008–3012.
- (17) Augner, S.; Kehler, J.; Szakacs, Z.; Breuer, E.; Haegele, G. Ring-Chain Tautomerism and Protolytic Equilibria of 3-Hydroxy-3-Phosphonoisobenzofuranone Studied by H-1, C-13 and P-31 and NMR-Controlled Titrations. *New J. Chem.* **2008**, *32*, 1608–1616.
- (18) Pihlaja, K.; Juhasz, M.; Kivela, H.; Fueleop, F. Substituent Effects on the Ring-Chain Tautomerism of Some 1,3-Oxazolidine Derivatives. *Rapid Commun. Mass Spectrom.* **2008**, *22*, 1510–1518.
- (19) Juhasz, M.; Lazar, L.; Fueleop, F. Substituent Effects in the Ring-Chain Tautomerism of 4-Alkyl-2aryl Substituted Oxazolidines and Tetrahydro-1,3-Oxazines. *J. Heterocycl. Chem.* **2007**, *44*, 1465–1473.
- (20) Ershov, A. Y.; Lagoda, I. V.; Yakimovich, S. I.; Pakal'nis, V. V.; Shamanin, V. V. Ring-Chain Tautomerism of the Condensation Product of Acetone with 2-Sulfanylbzenohydrazide. *Russ. J. Org. Chem.* **2007**, *43*, 1745–1746.
- (21) Coskun, N.; Asutay, O. Imidazolidin-1-Oles, N-2-Aminoethyl Nitrones and 1,2,5-Oxadiazinanes. A Novel Ring-Chain Tautomerism. *Tetrahedron Lett.* **2007**, *48*, 5151–5155.
- (22) Delaine, T.; Bernardes-Genisson, V.; Stigliani, J.-L.; Gornitzka, H.; Meunier, B.; Bernadou, J. Ring-Chain Tautomerism of Simplified Analogues of Isoniazid-NAD(P) Adducts: An Experimental and Theoretical Study. *Eur. J. Org. Chem.* **2007**, 1624–1630.

- (23) Juhasz, M.; Fulop, F.; Pihlaja, K. Substituent Effects on the Gas-Phase Ring-Chain Tautomerism of 3,4,5,6-Tetrahydro-2H-1,3-Oxazines. *Rapid Commun. Mass Spectrom.* **2007**, *21*, 3701–3710.
- (24) Smirnov, V. O.; Khomutova, Y. A.; Tishkov, A. A.; Ioffe, S. L. Silylation of Bicyclic Six-Membered Nitronates. Ring-Chain Tautomerism of Intermediate N,N Bis(oxy)iminium Cations. *Russ. Chem. Bull.* **2006**, *55*, 2061–2070.
- (25) Toth, D.; Szatmari, I.; Fulop, F. Substituent Effects in the Ring-Chain Tautomerism of 1-Alkyl-3-arylnaphth[1,2-e][1,3]oxazines. *Eur. J. Org. Chem.* **2006**, 4664–4669.
- (26) Szatmari, I.; Toth, D.; Koch, A.; Heydenreich, M.; Kleinpeter, E.; Fueleop, F. Study of the Substituent-Influenced Anomeric Effect in the Ring-Chain Tautomerism of 1-Alkyl-3-Aryl-naphth[1,2-e][1,3]oxazines. *Eur. J. Org. Chem.* **2006**, 4670–4675.
- (27) Maloshitskaya, O. A.; Sinkkonen, J.; Alekseyev, V. V.; Zelenin, K. N.; Pihlaja, K. A Comparison of Ring-Chain Tautomerism in Heterocycles Derived from 2-Aminobenzenesulfonamide and Anthranilamide. *Tetrahedron* **2005**, *61*, 7294–7303.
- (28) Perez, S.; Lopez, C.; Caubet, A.; Roig, A.; Molins, E. Ring-Chain Tautomerism of the Novel 2-Ferrocenyl-2,4-Dihydro-1H-3,1-Benzoxazine. *J. Org. Chem.* **2005**, *70*, 4857–4860.
- (29) Zalan, Z.; Hetenyi, A.; Lazar, L.; Fulop, F. Substituent Effects in the Ring-Chain Tautomerism of 4-Aryl-1,3,4,6,7,11b-Hexahydro-2H-pyrimido[6,1-A]isoquinolines. *Tetrahedron* **2005**, *61*, 5287–5295.
- (30) Keiko, N. A.; Funtikova, E. A.; Stepanova, L. G.; Larina, L. I. Reaction of 2-Alkoxypropenals with 2-Aminoethanethiol and Ring-Chain Tautomerism of the Resulting 2-(1-Alkoxyvinyl)-1,3-Thiazolidines. *Russ. J. Org. Chem.* **2005**, *41*, 517–522.
- (31) Maloshitskaya, O.; Sinkkonen, J.; Ovcharenko, V. V.; Zelenin, K. N.; Pihlaja, K. Chain-Ring-Chain Tautomerism in 2-Aryl-Substituted Hexahydropyrimidines and 1H-2,3-Dihydropyrimidines. Does It Appear? *Tetrahedron* **2004**, *60*, 6913–6921.
- (32) Szatmari, I.; Martinek, T. A.; Lazar, L.; Fulop, F. Synthesis of 2,4-Diaryl-3,4-Dihydro-2H-naphth[2,1-e][1,3]oxazines and Study of the Effects of the Substituents on Their Ring-Chain Tautomerism. *Eur. J. Org. Chem.* **2004**, 2231–2238.
- (33) Zlokazov, M. V.; Lozanova, A. V.; Veselovsky, V. V. New Type of Ring-Chain Tautomerism. Direct Evidence from H-1 NMR Spectroscopy. *Russ. Chem. Bull.* **2004**, *53*, 547–550.
- (34) Zlokazov, M. V.; Lozanova, A. V.; Veselovsky, V. V. New Examples of Ring-Chain Tautomeric Conversions. *Mendeleev Commun.* **2003**, 242–243.
- (35) Lazar, L.; Fulop, F. Recent Developments in the Ring-Chain Tautomerism of 1,3-Heterocycles. *Eur. J. Org. Chem.* **2003**, 3025–3042.
- (36) Struve, C.; Christophersen, C. Structural Equilibrium and Ring-Chain Tautomerism of Aqueous Solutions of 4-Aminobutyraldehyde. *Heterocycles* **2003**, *60*, 1907–1914.
- (37) Iulicci, R. J.; Clawson, J.; Hu, J. Z.; Solum, M. S.; Barich, D.; Grant, D. M.; Taylor, C. M. V. Ring-Chain Tautomerism in Solid-Phase Erythromycin A: Evidence by Solid-State NMR. *Solid State Nucl. Magn. Reson.* **2003**, *24*, 23–38.
- (38) Wang, M. X.; Liu, Y.; Gao, H. Y.; Zhang, Y.; Yu, C. Y.; Huang, Z. T.; Fleet, G. W. J. Ring-Chain Tautomerism in Organic Synthesis: Synthesis of Heterocyclic Enamines from a Novel and Practical Formal Ring Transformation Reaction of Lactones. *J. Org. Chem.* **2003**, *68*, 3281–3286.

- (39) Szatmari, I.; Martinek, T. A.; Lazar, L.; Fulop, F. Substituent Effects in the Ring-Chain Tautomerism of 1,3-Diaryl-2,3-Dihydro-1H-naphth[1,2-E] [1,3]oxazines. *Tetrahedron* **2003**, *59*, 2877–2884.
- (40) Sinkkonen, J.; Zelenin, K. N.; Potapov, A. K. A.; Lagoda, I. V.; Alekseyev, V. V.; Pihlaja, K. Ring-Chain Tautomerism in 2-Substituted 1,2,3,4-Tetrahydroquinazolines A H-1, C-13 and N-15 NMR Study. *Tetrahedron* **2003**, *59*, 1939–1950.
- (41) Sinkkonen, J.; Ovcharenko, V.; Zelenin, K. N.; Bezhan, I. P.; Chakchir, B. A.; Al-Assar, F.; Pihlaja, K. Stereoisomerism and Ring-Chain Tautomerism in 1-Hydroxy-2,3-Dihydro-1H-pyrazolo[1,2-A]pyridazine-5,8-Diones and 1-Hydroxy- and 1-Amino-2,3-Dihydro-1H-pyrazolo[1,2-B]phthalazine-5,10-Diones. *Eur. J. Org. Chem.* **2002**, 3447–3454.
- (42) Lazar, L.; Goblyos, A.; Martinek, T. A.; Fulop, F. Ring-Chain Tautomerism of 2-Aryl-Substituted Cis- and Trans-Decahydroquinazolines. *J. Org. Chem.* **2002**, *67*, 4734–4741.
- (43) Sinkkonen, J.; Ovcharenko, V.; Zelenin, K. N.; Bezhan, I. P.; Chakchir, B. A.; Al-Assar, F.; Pihlaja, K. H-1 and C-13 NMR Study of 1-Hydrazino-2,3-Dihydro-1H-pyrazolo[1,2-A]pyridazine-5,8-Diones and 1H-pyrazolo[1,2-B]phthalazine-5,10-Diones and Their Ring-Chain Tautomerism. *Eur. J. Org. Chem.* **2002**, 2046–2053.
- (44) Uncuta, C.; Tudose, A.; Caproiu, M. T.; Udrea, S.; Roussel, C. Hydration of 2-Isoxazoline Leading to a Stable 3,5,5-Trisubstituted 3-Isoxazolidinol - N-Acylated Derivatives and Ring-Chain Tautomerism Study. *Eur. J. Org. Chem.* **2002**, 1919–1924.
- (45) Kunimoto, K. K.; Sugiura, H.; Kato, T.; Senda, H.; Kuwae, A.; Hanai, K. Ring-Chain Tautomerism of Halogenated Phenolphthaleins: Vibrational Spectroscopic and Semiempirical MO Study. *Heterocycles* **2002**, *57*, 895–901.
- (46) Maieranu, C.; Darabantu, M.; Ple, G.; Berghian, C.; Condamine, E.; Ramondenc, Y.; Silaghi-Dumitrescu, I.; Mager, S. Ring-Chain Tautomerism and Other Versatile Behaviour of 1,4-Diimino- and 1,2-Phenylene Derivatives of Some C-Substituted Serinols. *Tetrahedron* **2002**, *58*, 2681–2693.
- (47) Goblyos, A.; Lazar, L.; Fulop, F. Ring-Chain Tautomerism of 2-Aryl-Substituted-Hexahydropyrimidines and Tetrahydroquinazolines. *Tetrahedron* **2002**, *58*, 1011–1016.
- (48) Terec, A.; Grosu, I.; Muntean, L.; Toupet, L.; Ple, G.; Socaci, C.; Mager, S. Synthesis, Stereochemistry and Ring-Chain Tautomerism of Some New Spiro-1,3-Oxathianes. *Tetrahedron* **2001**, *57*, 8751–8758.
- (49) Neuvonen, K.; Fulop, F.; Neuvonen, H.; Koch, A.; Kleinpeter, E.; Pihlaja, K. Substituent Influences on the Stability of the Ring and Chain Tautomers in 1,3-O,N-Heterocyclic Systems: Characterization by C-13 NMR Chemical Shifts, PM3 Charge Densities, and Isodesmic Reactions. *J. Org. Chem.* **2001**, *66*, 4132–4140.
- (50) Maier, O.; Frohlich, R.; Wurthwein, E. U. Polydonor-Substituted 1-Oxa- and 1-Thia-3,5-Diazahexatrienes: Synthesis, Structures, Ring-Chain Tautomerism and Theoretical Calculations. *Eur. J. Org. Chem.* **2001**, 83–92.
- (51) Fabian, W. M. F.; Bowden, K. Ab Initio and Density Functional Calculations on the Ring-Chain Tautomerism of Gamma-Oxocarboxylic Acids. *Eur. J. Org. Chem.* **2001**, 303–309.
- (52) Skrinarova, Z.; Bowden, K.; Fabian, W. M. F. An Ab Initio and Density Functional Study on the Ring-Chain Tautomerism of (Z)-3-Formyl-Acrylic Acid. *Chem. Phys. Lett.* **2000**, *316*, 531–535.
